## References

- 1 Kiyamaz N, Cirak B, Yilmaz N: Metastatic germ cell testicular tumor of the eye and brain: case report. *Acta Neurol Belg* 2005;105: 178–179.
- 2 Bosl GJ, Motzer RJ: Testicular germ-cell cancer. *N Engl J Med* 1997;337:242–253.
- 3 Bosl GJ, Sheinfeld J, Bajorin DF, Motzer RJ: Cancer of the testis; in De Vita VT Jr, Hellman S, Rosenberg SA (eds): *Cancer. Principles and Practice of Oncology*, ed 5. Philadelphia, Lippincott-Raven, 1997, pp 1397–1425.
- 4 Camarillo Gómez C, Sánchez Ronco I, Encinas J: Choroidal metastases (in Spanish). *An Sist Sanit Navar* 2008;31(suppl 3):127–134.
- 5 Galetović D, Bućan K, Karlica D, Lesin M, Znaor L: Bilateral choroidal metastases of kidney carcinoma (in Croatian). *Acta Med Croatica* 2010;64:221–224.
- 6 International Germ Cell Consensus Classification: a prognostic factor based staging system for metastatic germ cell cancers. *J Clin Oncol* 1997;15:594–603.
- 7 Piccinin MR, Almeida JA Jr, Aydos RD, Nogueira DC, Silva RF: Choroid metastasis of testicular primary site: case report (in Portuguese). *Arq Bras Oftalmol* 2006;69:949–953.
- 8 Purandare NC, Sanghvi DA, Thakur MH: Choroidal metastasis from non-seminomatous germ cell tumour of the testis. *Br J Radiol* 2008;81:e188–e190.
- 9 Tarkkanen A, Laatikainen L, Mäkinen J, Merenmies L: Mediastinal embryonal carcinoma with bilateral choroidal metastases. Fluorescein angiographic and histopathologic study. *Ophthalmologica* 1979;179:77–82.

## Erratum

In the article by Alidjanov JF, Abdufattaev UA, Makhsudov SA, Pilatz A, Akilov FA, Naber KG and Wagenlehner FM, entitled 'New self-reporting questionnaire to assess urinary tract infections and differential diagnosis: Acute Cystitis Symptom Score' [*Urol Int* 2014;92:230–236, DOI: 10.1159/000356177], the following errors need to be corrected:

1. In the section Study Population: Characteristics of Patients and Controls, in lines 13/14, it should read 'questionnaire part B for further monitoring'.
2. Table 3 has a few calculation errors and needs to be replaced as follows:

**Table 3.** Differences in scores between first and subsequent visits (n = 63)

| Scores gained in different scales of the ACSS | First visit (mean score) | Follow-up visit (mean score) | Mean difference    | Wilcoxon signed-rank test <sup>a</sup> |
|-----------------------------------------------|--------------------------|------------------------------|--------------------|----------------------------------------|
| 'Typical' subcale                             | 11.21                    | 2.08                         | –9.13              | –975.5                                 |
| 'Differential' subcale                        | 2.17                     | 0.82 <sup>b</sup>            | –1.35 <sup>b</sup> | –540.5                                 |
| 'QoL' subcale                                 | 5.79                     | 1.27                         | –4.52              | –798.0                                 |

<sup>a</sup> All differences are statistically significant at  $p < 0.0001$ . <sup>b</sup> Based on the sum of scores of 61 cases with non-missing values.

3. In the Conclusions section, in the 5th line, the number has to be corrected to '286'.
